# Supplementary material
Source: ML conference proceedings conference paper supplement (https://openaccess.thecvf.com/content/CVPR2023/html/Liu_SynthVSR_Scaling_Up_CVPR_2023_paper.html)
Supplement: Supplementary file 2 [file Liu_SynthVSR_Scaling_Up_CVPR_2023_supplemental.zip]

Archive with 4 entries (4 files):
- Supplementary_Material.pdf
- __MACOSX/._Supplementary_Material.pdf
- video.mp4
- __MACOSX/._video.mp4
